# Supplementary material
Source: PubMed Central journal article supplement (PMC5537074)

**SUPPORTING INFORMATION FOR PUBLICATION**

**Structure-Activity Relationship of INT131 Analogs for PPAR $\gamma$ -  
Targeted Antidiabetics**

**Rebecca L. Frkic<sup>a</sup>, Beatriz B. Rodriguez<sup>c</sup>, Mi Ra Chang<sup>b</sup>, Dana Kuruvilla<sup>b</sup> Anthony  
Ciesla<sup>b</sup>, Andrew D. Abell<sup>c</sup>, Theodore Kamenecka<sup>b</sup>, Patrick R. Griffin<sup>b</sup>, and John B.  
Bruning<sup>a,\*</sup>**

<sup>a</sup>School of Biological Sciences

<sup>c</sup>Department of Chemistry

The University of Adelaide

Adelaide, South Australia, 5005, Australia

<sup>b</sup> Department of Molecular Therapeutics, The Scripps Research Institute, Scripps Florida , Jupiter,  
Florida 33458, United States.

\*To whom correspondence should be addressed. John B. Bruning, School of Biological Sciences,  
Adelaide, South Australia, Australia, Tel.: +61 (08) 8313-5218; Fax: +61 (08) 8313-4362; E-mail:  
[john.bruning@adelaide.edu.au](mailto:john.bruning@adelaide.edu.au)

**Contents:**

**Chemical Synthesis Including <sup>1</sup>HNMR, MS, and Anal HPLC: S2-S26.**

**Figure S1. Reduced model bias electron density map of 9: S27.**

**Figure S2. Validation of docking methods using INT131 crystal structure (yellow sticks, PDB: 3FUR) and docked INT131 (blue sticks) into the PPAR $\gamma$  LBD receptor: S28.**

**Chemical synthesis.**

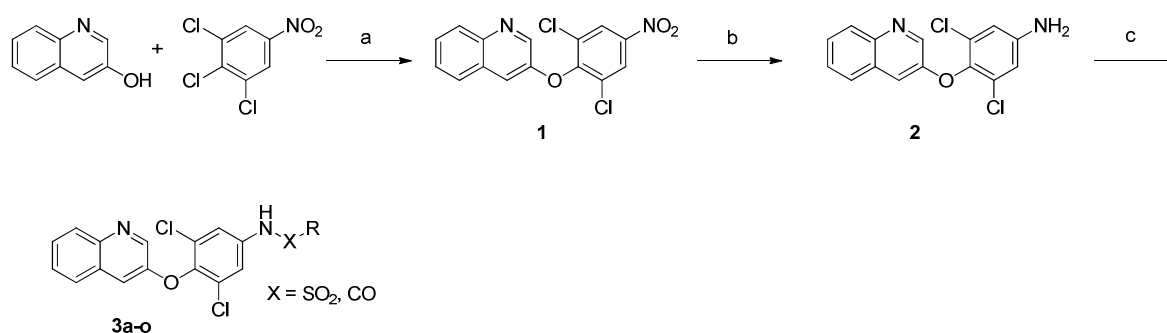

Reaction Conditions: a) Cs<sub>2</sub>CO<sub>3</sub>, DMAC, 60 °C; b) NH<sub>4</sub>Cl, Fe, 70 °C; c) RSO<sub>2</sub>Cl or RCOCl, DIEA, CH<sub>2</sub>Cl<sub>2</sub>

**General procedure for determining percent purity of all compounds.** Reverse-phase analytical HPLC was used to determine purity for all compounds. All percent purities are located in Table I with all but 5 at or above 95% purity.

**General Procedure: Preparation of 3-(2,6-dichloro-4-nitrophenoxy)quinoline (1).** To a solution of 3-hydroxyquinoline (1g) and 1,2,3-trichloro-5-nitrobenzene (1.6g) in DMAC (30mL) was added Cs<sub>2</sub>CO<sub>3</sub> (2.5g). The reaction mixture was warmed to 60 °C for 2h, wherein analytical HPLC analysis indicated the reaction was complete. The reaction mixture was poured into ice/water (100mL) and the resulting mixture was stirred for 1h. The light yellow precipitate was collected by filtration to afford **1** which was used without further purification.

**General Procedure: Preparation of 3,5-dichloro-4-(quinolin-3-yloxy)aniline (2).** To a solution of crude **1** (1.95g) in ethanol/THF/water (4:2:1 by volume, 28 mL) was added NH<sub>4</sub>Cl (0.93g) and powdered iron (0.96g). The mixture was warmed to reflux overnight. After 16h, the hot mixture was

filtered through celite and concentrated *in vacuo*. The residue was dissolved in EtOAc, and washed with sat. aq. NaHCO<sub>3</sub>, water, brine, and then dried (MgSO<sub>4</sub>), and concentrated to afford the title compound as a pale red solid which was used without further purification

**General Procedure: Preparation of 2,4-dichloro-N-(3,5-dichloro-4-(quinolin-3-yloxy)phenyl)benzenesulfonamide (3a, INT-131).** To the solution crude **2** (0.1g) in CH<sub>2</sub>Cl<sub>2</sub> was added 2,4-dichlorobenzene sulfonyl chloride (0.16g) followed by DIEA (0.11mL). The reaction mixture was stirred at room temperature for 12h, and then warmed to 40 °C for 3h. After cooling, the reaction was concentrated *in vacuo*, and the crude residue was purified by reverse-phase preparative HPLC, to afford the title compound as a colorless solid.

**(1): 4-bromo-N-(3,5-dichloro-4-(quinolin-3-yloxy)phenyl)-3-methylbenzenesulfonamide:** The title compound was made following the same general protocol as described for **3a**, using 3-methyl-4-bromosulfonyl chloride.

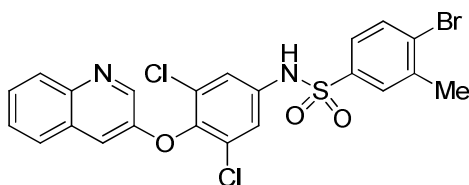

SR-1635

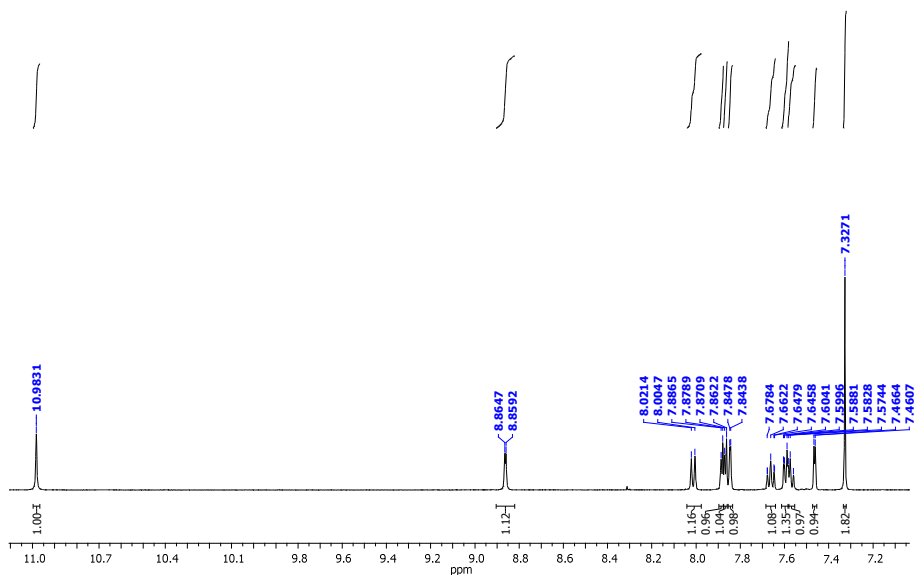

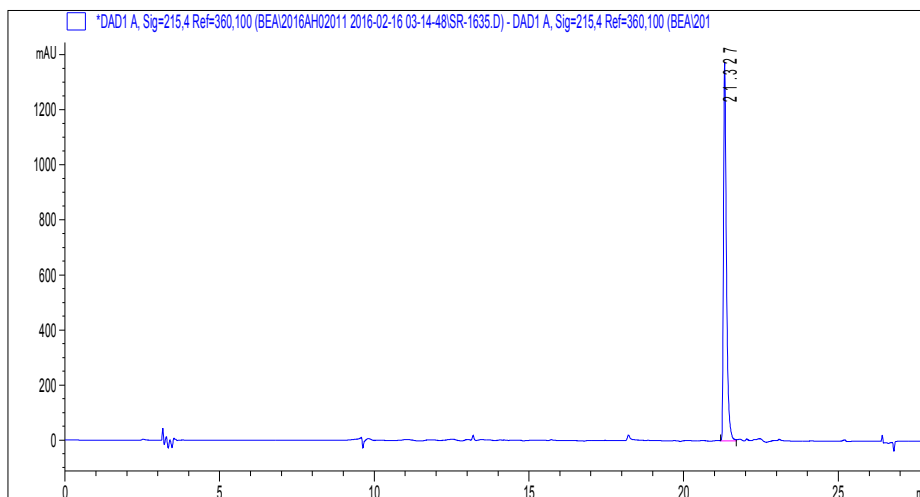

$^1\text{H NMR}$  (500 MHz,  $\text{DMSO-}d_6$ )  $\delta$  10.98 (s, 1H), 8.86 (d,  $J = 2.8$  Hz, 1H), 8.01 (d,  $J = 8.4$  Hz, 1H), 7.88 (d,  $J = 3.8$  Hz, 1H), 7.87 (d,  $J = 4.4$  Hz, 1H), 7.85 (d,  $J = 2.0$  Hz, 1H), 7.68–7.64 (m, 1H), 7.59 (dd,  $J = 8.2, 2.4$  Hz, 1H), 7.57 (t,  $J = 5.7$  Hz, 1H), 7.46 (d,  $J = 2.8$  Hz, 1H) and 7.33 (s, 2H) ppm.

**MS HRMS** (ESI) calcd for  $\text{C}_{21}\text{H}_{16}\text{BrCl}_2\text{N}_2\text{O}_3\text{S}$  ( $\text{M-H}^+$ ): 536.9437, found 536.9436.

**Anal HPLC** Analytical HPLC: Sample was dissolved in methanol (1 mg/ml) and eluted with solvent A: 0.1% TFA in Milliq water and solvent B: 0.08% TFA in MeCN on a phenomenex Luna 5  $\mu\text{M}$  C18 (2) (250 x 4.60 mm), flow rate = 1 ml/min, gradient 0–100% of solvent B over 30 min, with UV detection at 215 nm. Retention time 21.33 min. Purity 100 %.

**(2): 4-bromo-N-(3,5-dichloro-4-(quinolin-3-yloxy)phenyl)-2-**

**(trifluoromethoxy)benzenesulfonamide:** The title compound was made following the same general protocol as described for **3a**, using 2-trifluoromethoxy-4-bromosulfonyl chloride.

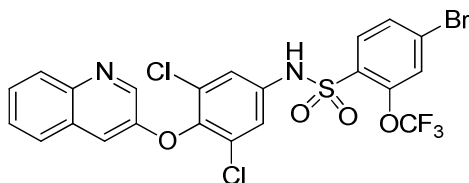

SR-1636 (1H NMR)

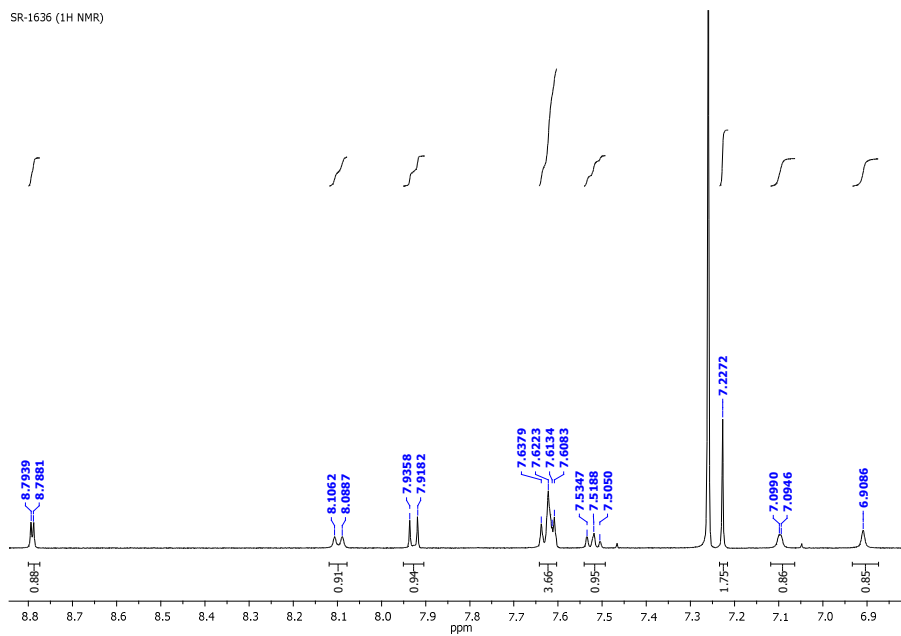

SR-1636 (19F NMR)

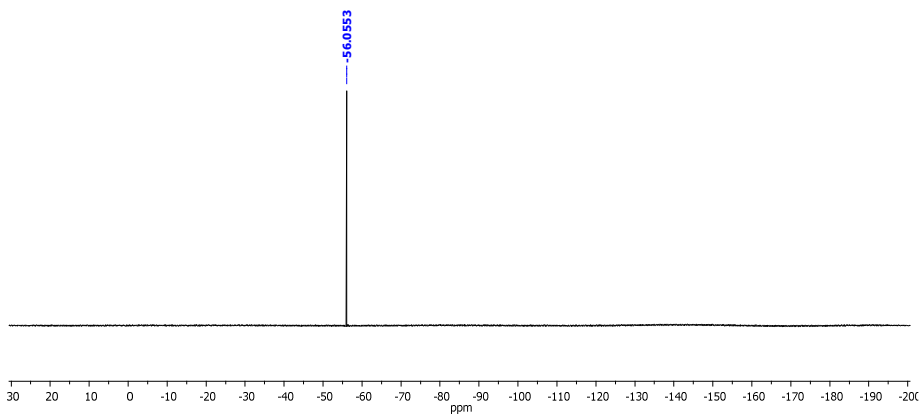

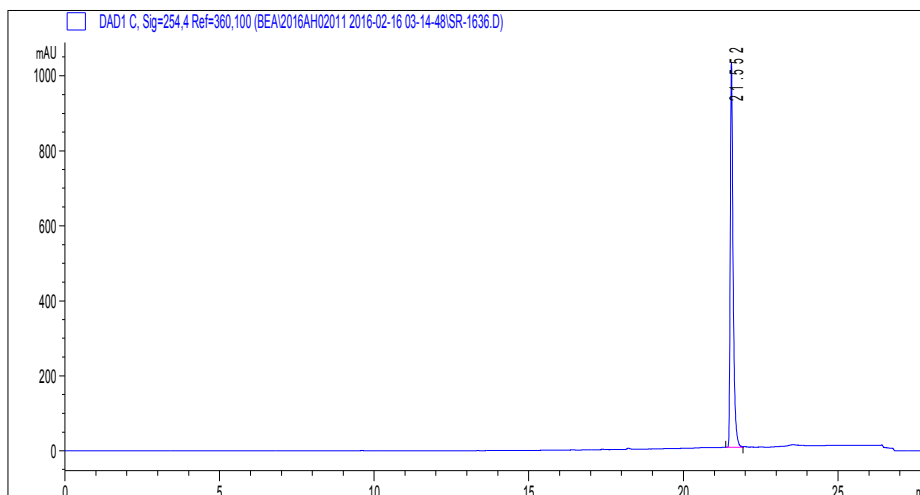

$^1\text{H NMR}$  (500 MHz,  $\text{CDCl}_3$ )  $\delta$  8.79 (d,  $J = 2.9$  Hz, 1H), 8.10 (d,  $J = 9.3$  Hz, 1H), 7.93 (d,  $J = 8.8$  Hz, 1H), 7.64–7.60 (m, 4H), 7.54–7.49 (m, 1H), 7.23 (s,  $J = 4.0$  Hz, 2H), 7.10 (d,  $J = 2.8$  Hz, 1H) and 6.91 (s, 1H) ppm.

$^{19}\text{F NMR}$  (470 MHz,  $\text{CDCl}_3$ )  $\delta$  -56.06 (s) ppm.

**MS HRMS** (ESI) calcd for  $\text{C}_{22}\text{H}_{13}\text{BrCl}_2\text{F}_3\text{N}_2\text{O}_4\text{S}$  ( $\text{M}-\text{H}^+$ ): 606.9103, found 606.9109.

**Anal HPLC** Analytical HPLC: Sample was dissolved in methanol (1 mg/ml) and eluted with solvent A: 0.1% TFA in Milliq water and solvent B: 0.08% TFA in MeCN on a phenomenex Luna 5  $\mu\text{M}$  C18 (2) (250 x 4.60 mm), flow rate = 1 ml/min, gradient 0–100% of solvent B over 30 min, with UV detection at 254 nm. Retention time 21.55 min. Purity 100 %.

**(3): 4-bromo-2-chloro-N-(3,5-dichloro-4-(quinolin-3-yloxy)phenyl)benzenesulfonamide:** The title compound was made following the same general protocol as described for **3a**, using 2-chloro-4-bromosulfonyl chloride.

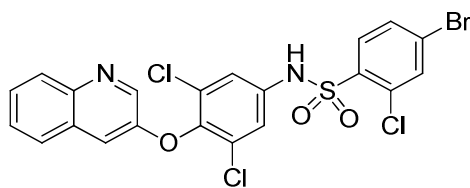

SR-1637

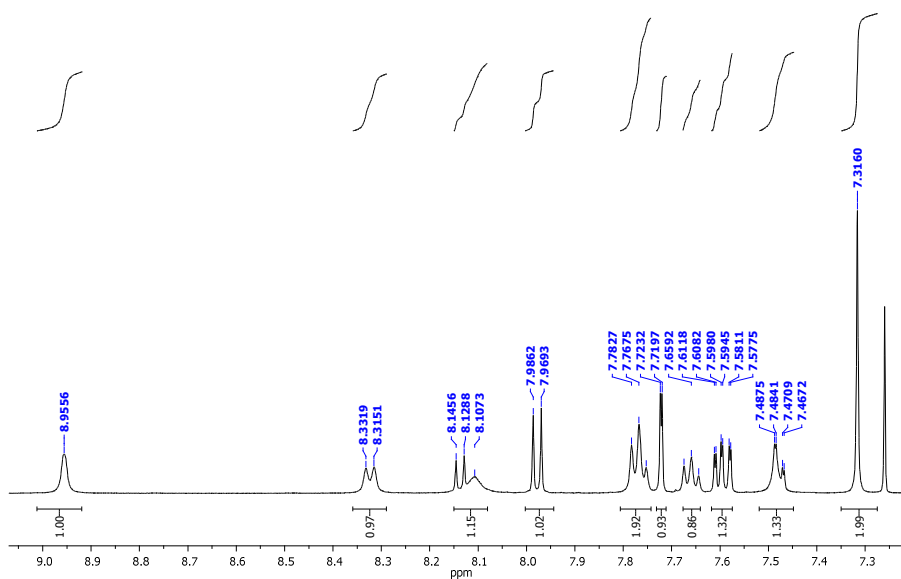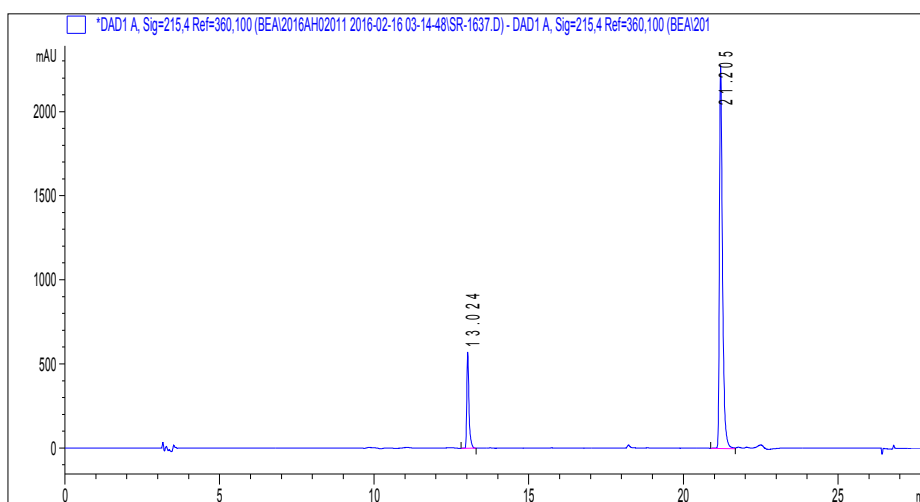

$^1\text{H NMR}$  (500 MHz,  $\text{CDCl}_3$ )  $\delta$  8.96 (s, 1H), 8.32 (d,  $J = 8.4$  Hz, 1H), 8.13 (m, 1H), 7.98 (d,  $J = 8.5$  Hz, 1H), 7.77 (t,  $J = 7.5$  Hz, 2H), 7.72 (d,  $J = 1.8$  Hz, 1H), 7.66 (t,  $J = 7.5$  Hz, 1H), 7.62–7.57 (m, 1H), 7.48 (dd,  $J = 8.3, 1.8$  Hz, 1H) and 7.32 (s, 2H) ppm.

**MS HRMS** (ESI) calcd for  $\text{C}_{21}\text{H}_{13}\text{BrCl}_3\text{N}_2\text{O}_3\text{S}$  ( $\text{M}-\text{H}^+$ ): 556.8890, found 556.8867.

**Anal HPLC** Analytical HPLC: Sample was dissolved in methanol (1 mg/ ml) and eluted with solvent A: 0.1% TFA in Milliq water and solvent B: 0.08% TFA in MeCN on a phenomenex Luna 5 uM C18 (2) (250 x 4.60 mm), flow rate = 1 ml/min, gradient 0–100% of solvent B over 30 min, with UV detection at 215 nm. Retention time 21.20 min. Purity 85 %.

**(4): 4-bromo-N-(3,5-dichloro-4-(quinolin-3-yloxy)phenyl)-3-**

**(trifluoromethyl)benzenesulfonamide:** The title compound was made following the same general protocol as described for **3a**, using 3-trifluoromethyl-4-bromosulfonyl chloride.

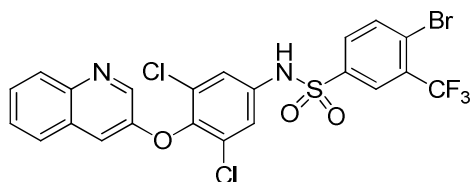

SR-1638 (1H NMR)

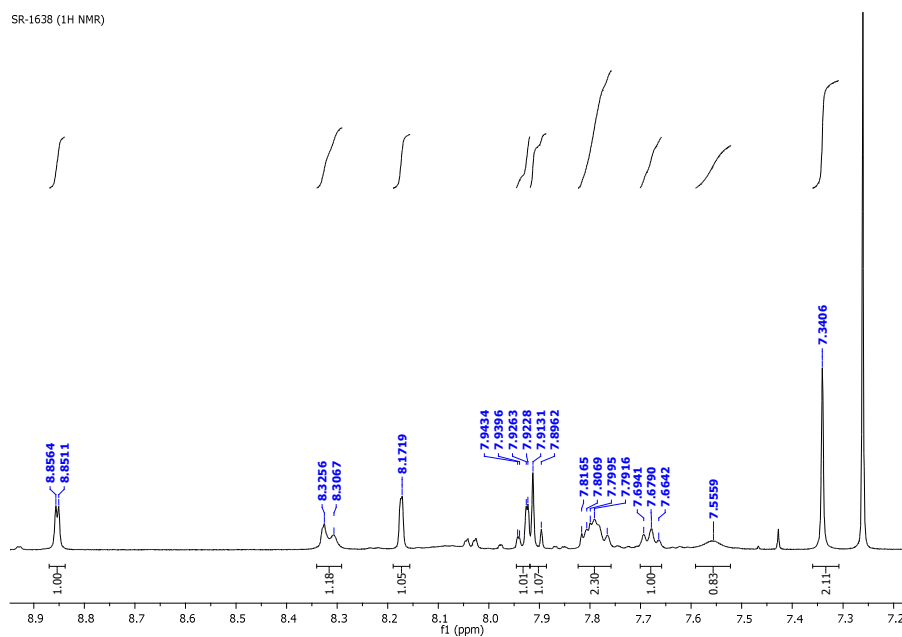



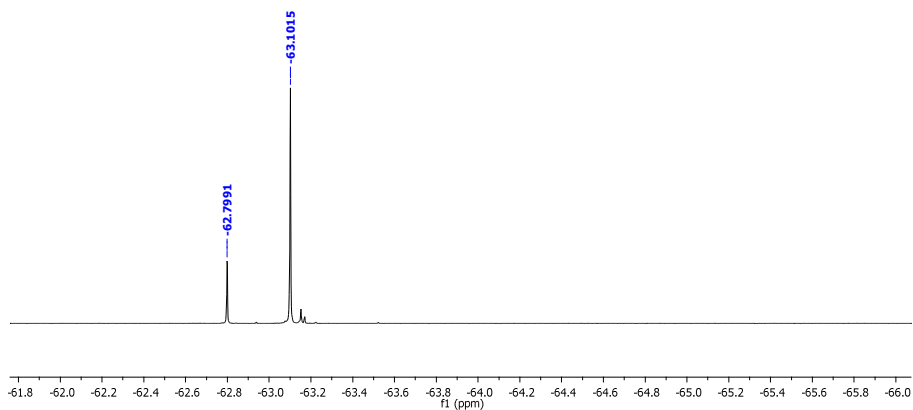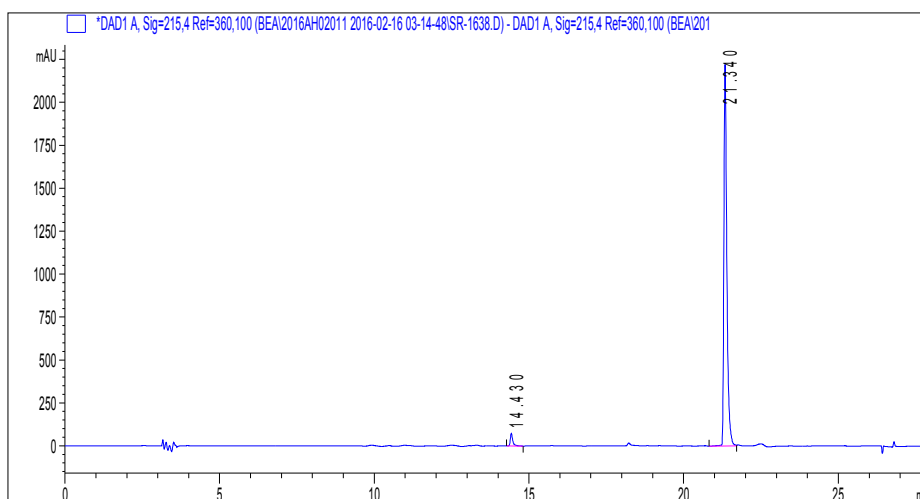

$^1\text{H}$  NMR (500 MHz,  $\text{CDCl}_3$ )  $\delta$  8.85 (d,  $J = 2.7$  Hz, 1H), 8.34–8.29 (m, 1H), 8.17 (s, 1H), 7.93 (dd,  $J = 8.5$  and 1.8 Hz, 1H), 7.90 (d,  $J = 8.5$  Hz, 1H), 7.82–7.76 (m, 2H), 7.68 (t,  $J = 7.5$  Hz, 1H), 7.59–7.52 (m, 1H) and 7.34 (s, 2H) ppm.

$^{19}\text{F}$  NMR (470 MHz,  $\text{CDCl}_3$ )  $\delta$  -62.80 (s) and -63.10 (s) ppm.

MS HRMS (ESI) calcd for  $\text{C}_{22}\text{H}_{13}\text{BrCl}_2\text{F}_3\text{N}_2\text{O}_3\text{S}$  ( $\text{M}-\text{H}^+$ ): 590.9154, found 590.9171.

**Anal HPLC** Analytical HPLC: Sample was dissolved in methanol (1 mg/ml) and eluted with solvent A: 0.1% TFA in Milliq water and solvent B: 0.08% TFA in MeCN on a phenomenex Luna 5 uM C18 (2) (250 x 4.60 mm), flow rate = 1 ml/min, gradient 0–100% of solvent B over 30 min, with UV detection at 215 nm. Retention time 21.34 min. Purity 97 %.

**(5): 4-bromo-N-(3,5-dichloro-4-(quinolin-3-yloxy)phenyl)-2-**

**(trifluoromethyl)benzenesulfonamide:** The title compound was made following the same general protocol as described for **3a**, using 2-trifluoromethyl-4-bromosulfonyl chloride.

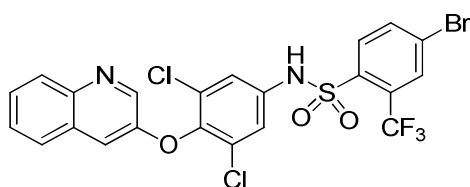

SR-1639

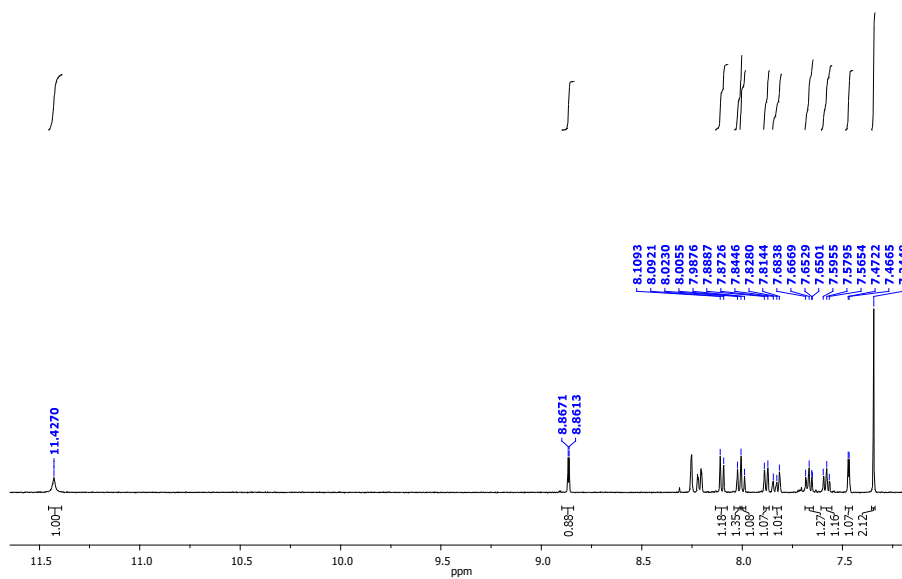

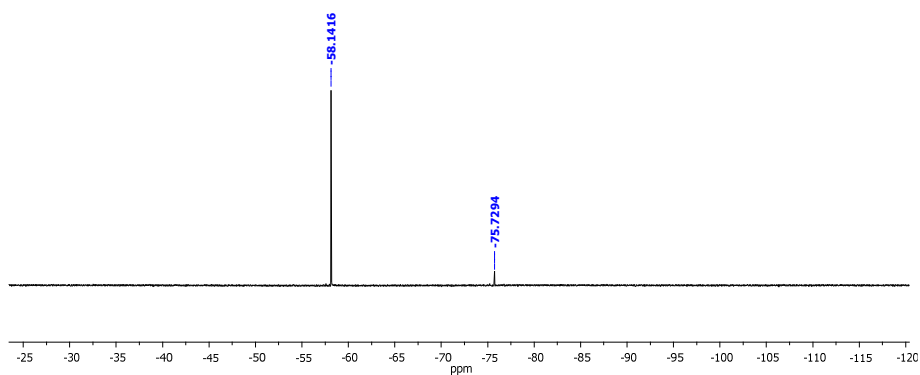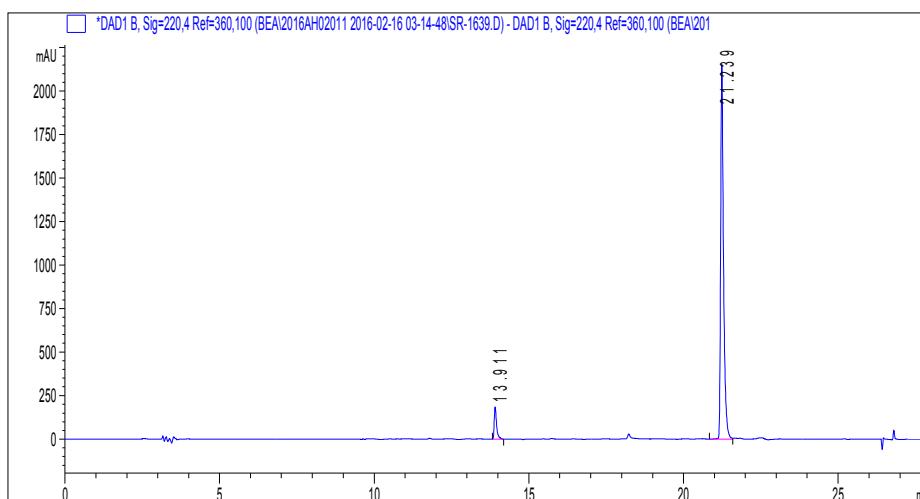

$^1\text{H}$  NMR (500 MHz,  $\text{DMSO}-d_6$ )  $\delta$  11.43 (s, 1H), 8.86 (d,  $J = 2.9$  Hz, 1H), 8.10 (d,  $J = 8.6$  Hz, 1H), 8.01 (d,  $J = 8.7$  Hz, 1H), 8.00 (d,  $J = 8.9$  Hz, 1H), 7.88 (d,  $J = 8.1$  Hz, 1H), 7.85–7.81 (m, 1H), 7.69–7.65 (m, 1H), 7.61–7.55 (m, 1H), 7.47 (d,  $J = 2.8$  Hz, 1H) and 7.34 (s, 2H) ppm.

$^{19}\text{F}$  NMR (470 MHz,  $\text{CDCl}_3$ )  $\delta$   $-58.14$  (s) ppm.

MS HRMS (ESI) calcd for  $\text{C}_{22}\text{H}_{13}\text{BrCl}_2\text{F}_3\text{N}_2\text{O}_3\text{S}$  ( $\text{M}-\text{H}^+$ ): 590.9154, found 590.9153.

**Anal HPLC** Analytical HPLC: Sample was dissolved in methanol (1 mg/ ml) and eluted with solvent A: 0.1% TFA in Milliq water and solvent B: 0.08% TFA in MeCN on a phenomenex Luna 5 uM C18 (2) (250 x 4.60 mm), flow rate = 1 ml/min, gradient 0–100% of solvent B over 30 min, with UV detection at 220 nm. Retention time 21.24 min. Purity 93 %.

**(6): N-(3,5-dichloro-4-(quinolin-3-yloxy)phenyl)thiophene-2-carboxamide:** The title compound was made following the same general protocol as described for **3a**, using 3-methoxybenzoylchloride.

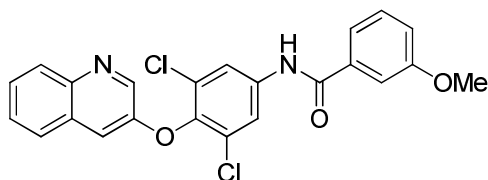

SR-1640

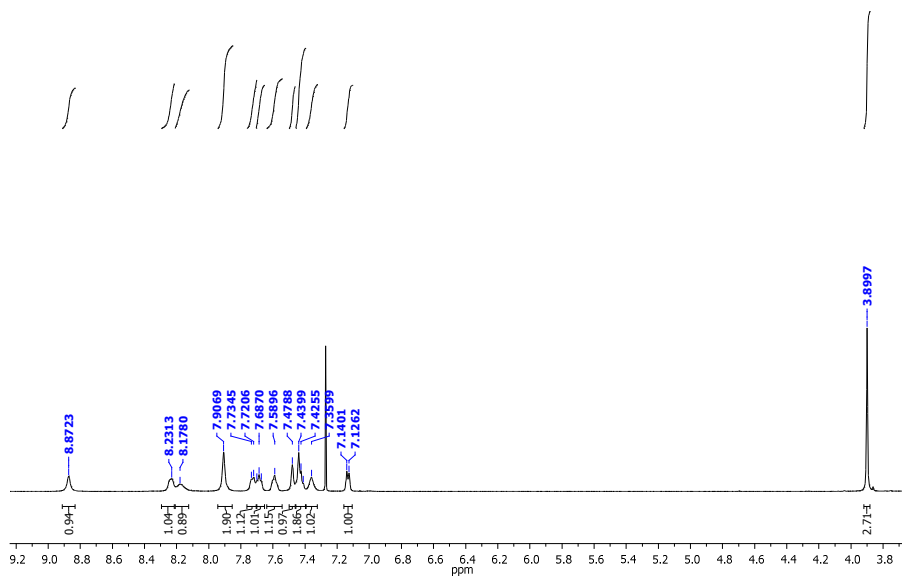

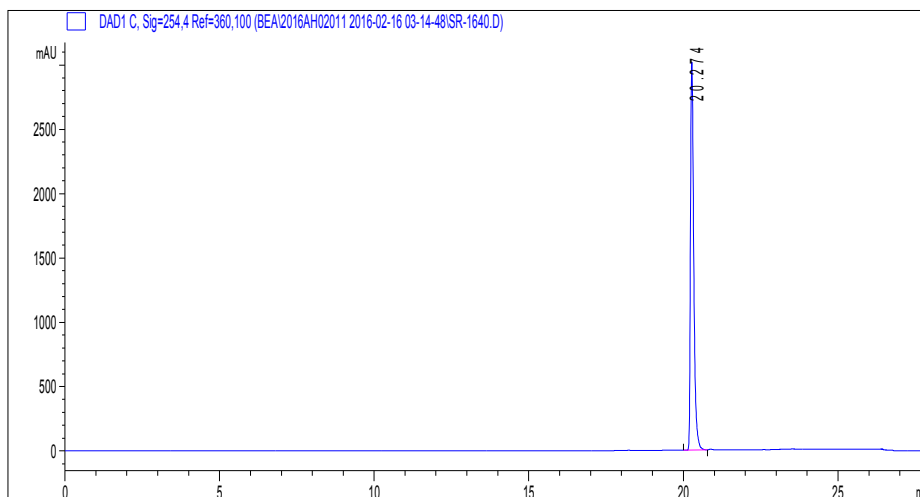

$^1\text{H NMR}$  (500 MHz,  $\text{CDCl}_3$ )  $\delta$  8.87 (s, 1H), 8.24 (d,  $J = 5.9$  Hz, 1H), 8.18 (s, 1H), 7.91 (s, 2H), 7.76–7.70 (m, 1H), 7.69 (t,  $J = 7.0$  Hz, 1H), 7.59 (t,  $J = 6.3$  Hz, 1H), 7.48 (s, 1H), 7.46–7.40 (m, 2H), 7.36 (s, 1H), 7.13 (d,  $J = 6.9$  Hz, 1H), 3.90 (s, 3H).

**MS HRMS** (ESI) calcd for  $\text{C}_{23}\text{H}_{17}\text{Cl}_2\text{N}_2\text{O}_3$  ( $\text{M}-\text{H}^+$ ): 439.0611, found 439.0635.

**Anal HPLC** Analytical HPLC: Sample was dissolved in methanol (1 mg/ml) and eluted with solvent A: 0.1% TFA in Milliq water and solvent B: 0.08% TFA in MeCN on a phenomenex Luna 5  $\mu\text{M}$  C18 (2) (250 x 4.60 mm), flow rate = 1 ml/min, gradient 0–100% of solvent B over 30 min, with UV detection at 254 nm. Retention time 20.27 min. Purity 100 %.

**(7): 4-bromo-N-(3,5-dichloro-4-(quinolin-3-yloxy)phenyl)-2-fluorobenzenesulfonamide:** The title compound was made following the same general protocol as described for **3a**, using 2-fluoro-4-bromosulfonyl chloride.

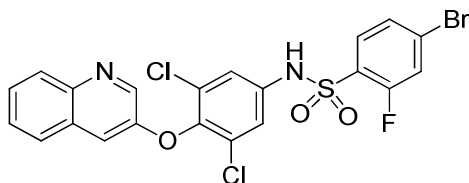

SR-1641 (1H NMR)

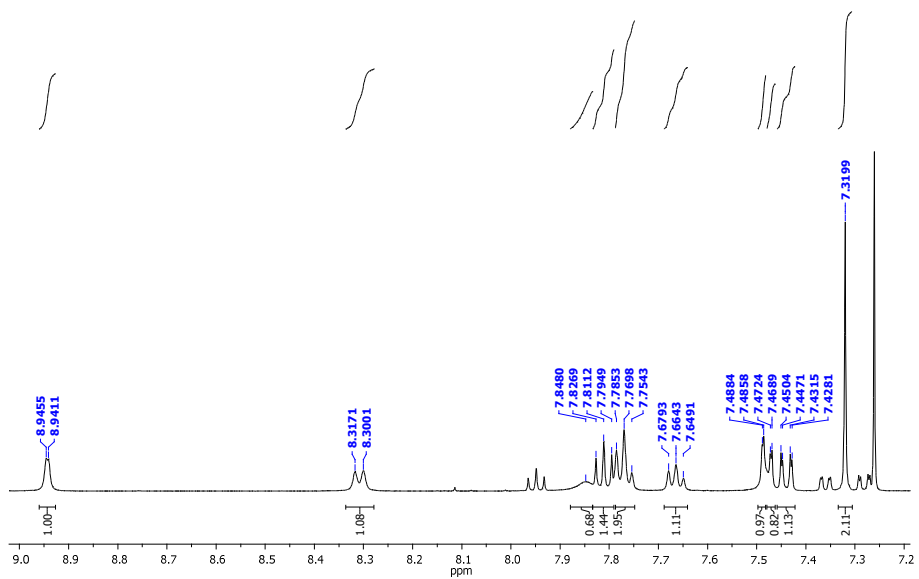

SR-1641 (19F NMR)

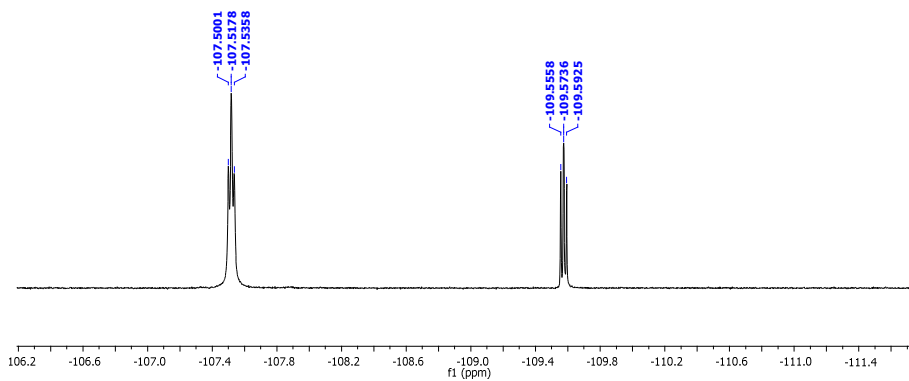

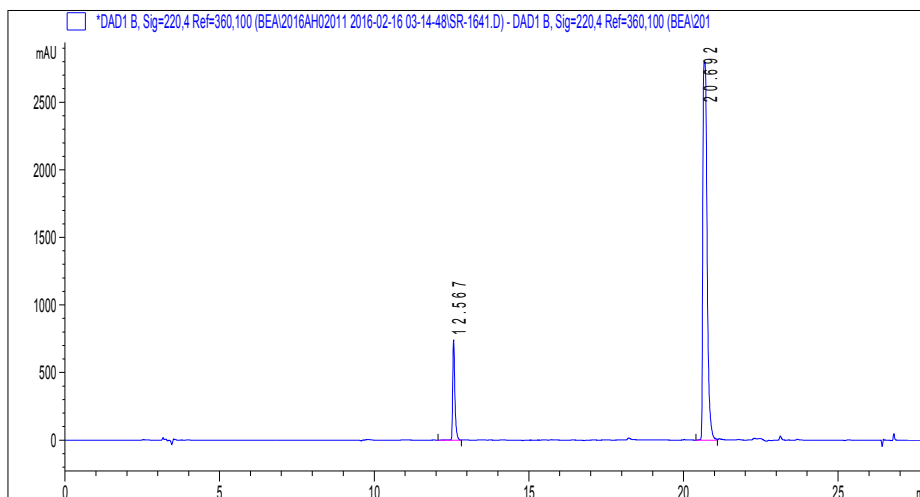

$^1\text{H NMR}$  (500 MHz,  $\text{CDCl}_3$ )  $\delta$  8.94 (d,  $J = 2.2$  Hz, 1H), 8.31 (d,  $J = 8.5$  Hz, 1H), 7.88–7.83 (br s, 1H), 7.83–7.79 (m, 1H), 7.77 (t,  $J = 7.8$  Hz, 2H), 7.66 (t,  $J = 7.6$  Hz, 1H), 7.49 (d,  $J = 1.3$  Hz, 1H), 7.47 (d,  $J = 1.7$  Hz, 1H), 7.44 (dd,  $J = 9.5, 1.7$  Hz, 1H) and 7.32 (s, 2H) ppm.

$^{19}\text{F NMR}$  (470 MHz,  $\text{CDCl}_3$ )  $\delta$  -107.52 (t,  $J = 8.4$  Hz) ppm.

**MS HRMS** (ESI) calcd for  $\text{C}_{21}\text{H}_{13}\text{BrCl}_2\text{FN}_2\text{O}_3\text{S}$  ( $\text{M}-\text{H}^+$ ): 540.9186, found 540.9197.

**Anal HPLC** Analytical HPLC: Sample was dissolved in methanol (1 mg/ml) and eluted with solvent A: 0.1% TFA in Milliq water and solvent B: 0.08% TFA in MeCN on a phenomenex Luna 5  $\mu\text{M}$  C18 (2) (250 x 4.60 mm), flow rate = 1 ml/min, gradient 0–100% of solvent B over 30 min, with UV detection at 220 nm. Retention time 20.69 min. Purity 88 %.

**(8): 4-bromo-N-(3,5-dichloro-4-(quinolin-3-yloxy)phenyl)-3-fluorobenzenesulfonamide:** The title compound was made following the same general protocol as described for **3a**, using 3-fluoro-4-bromosulfonyl chloride.

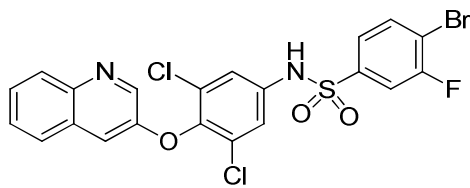

SR-1642

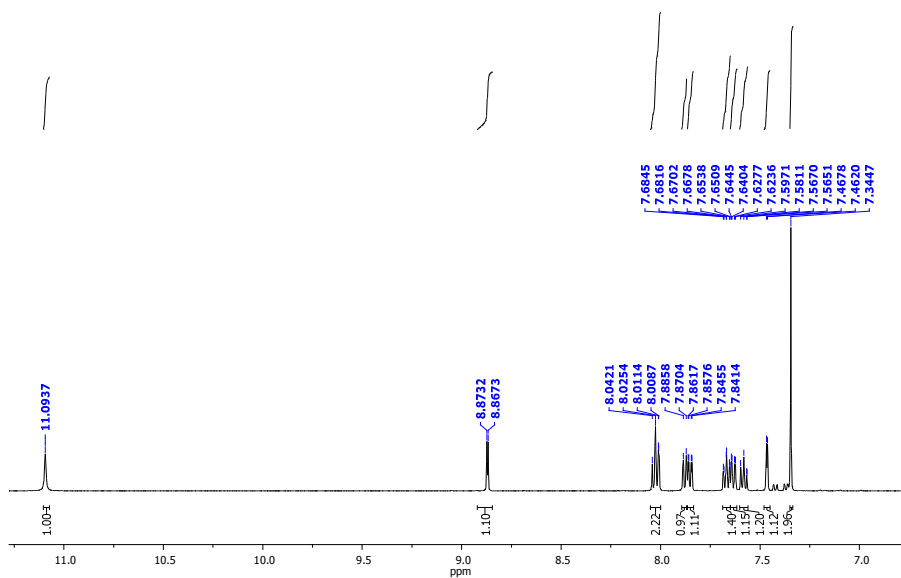

SR-1642 (19F NMR)

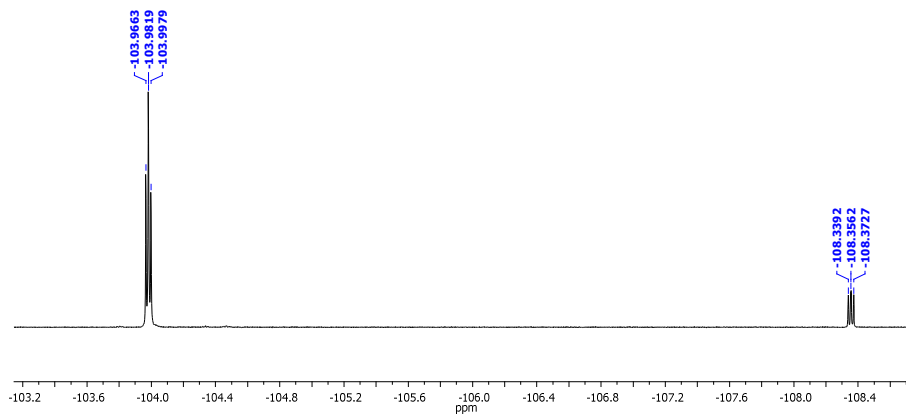



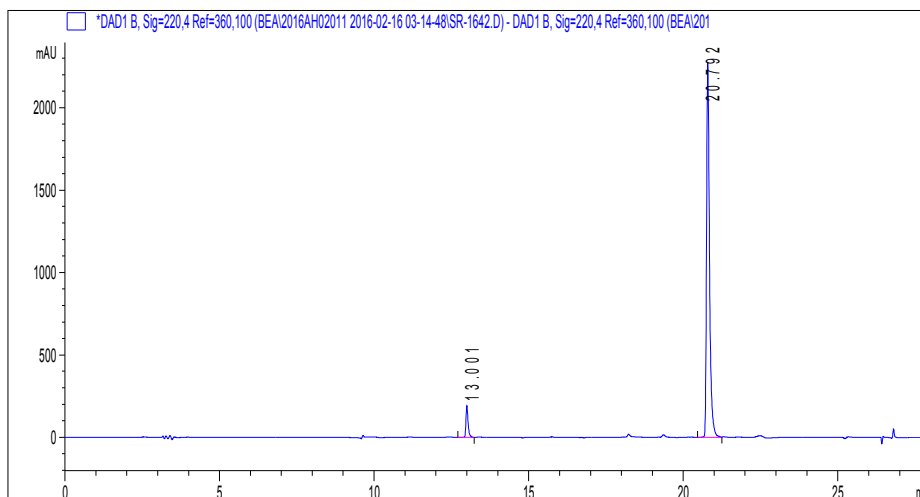

**<sup>1</sup>H NMR** (500 MHz, DMSO-*d*<sub>6</sub>) δ 11.09 (s, 1H), 8.87 (d, *J* = 2.9 Hz, 1H), 8.05–8.00 (m, 2H), 7.88 (d, *J* = 7.7 Hz, 1H), 7.85 (dd, *J* = 8.1, 2.0 Hz, 1H), 7.69–7.65 (m, 1H), 7.63 (dd, *J* = 8.4, 2.0 Hz, 1H), 7.60–7.56 (m, 1H), 7.46 (d, *J* = 2.9 Hz, 1H) and 7.34 (s, 2H) ppm.

**<sup>19</sup>F NMR** (470 MHz, CDCl<sub>3</sub>) δ –103.98 (t) ppm.

**MS HRMS** (ESI) calcd for C<sub>21</sub>H<sub>13</sub>BrCl<sub>2</sub>FN<sub>2</sub>O<sub>3</sub>S (M–H<sup>+</sup>): 540.9186, found 540.9198.

**Anal HPLC** Analytical HPLC: Sample was dissolved in methanol (1 mg/ ml) and eluted with solvent A: 0.1% TFA in Milliq water and solvent B: 0.08% TFA in MeCN on a phenomenex Luna 5 uM C18 (2) (250 x 4.60 mm), flow rate = 1 ml/min, gradient 0–100% of solvent B over 30 min, with UV detection at 220 nm. Retention time 20.79 min. Purity 94 %.

**(9): 4-bromo-N-(3,5-dichloro-4-(quinolin-3-yloxy)phenyl)-2,5-difluorobenzenesulfonamide:** The title compound was made following the same general protocol as described for **3a**, using 2,5-difluoro-4-bromosulfonyl chloride.

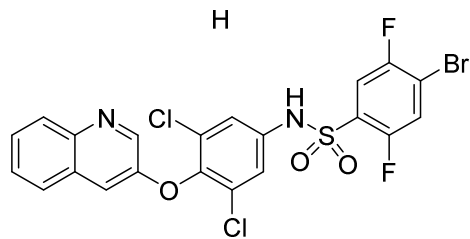

SR-1643 (1H NMR)

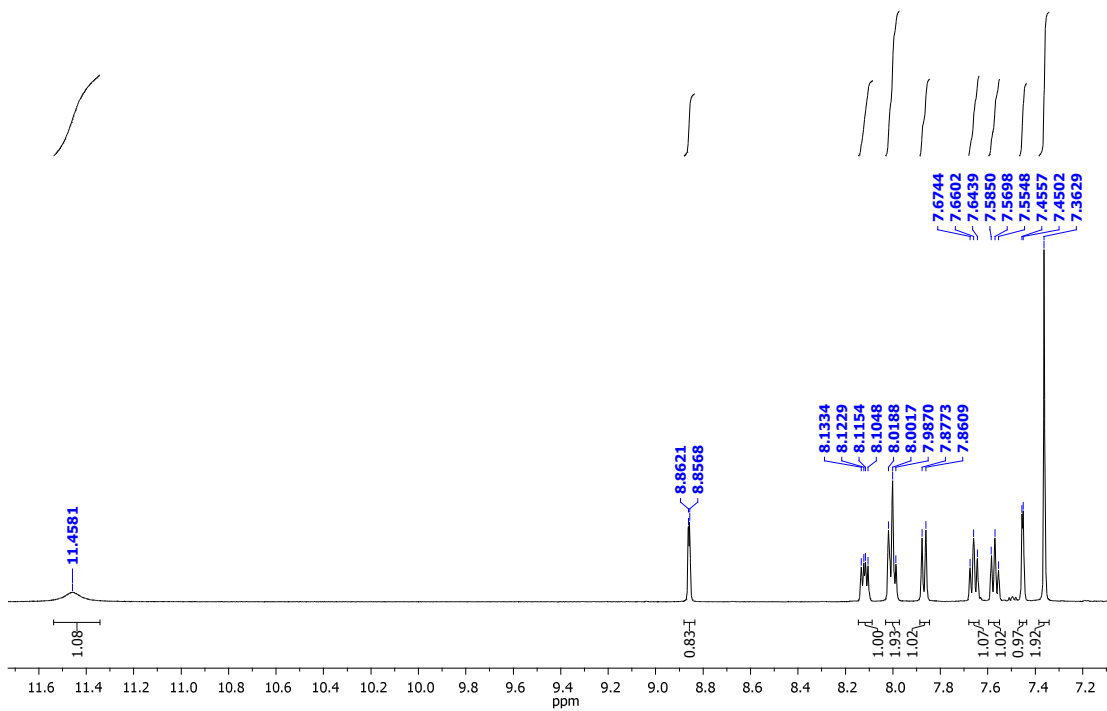

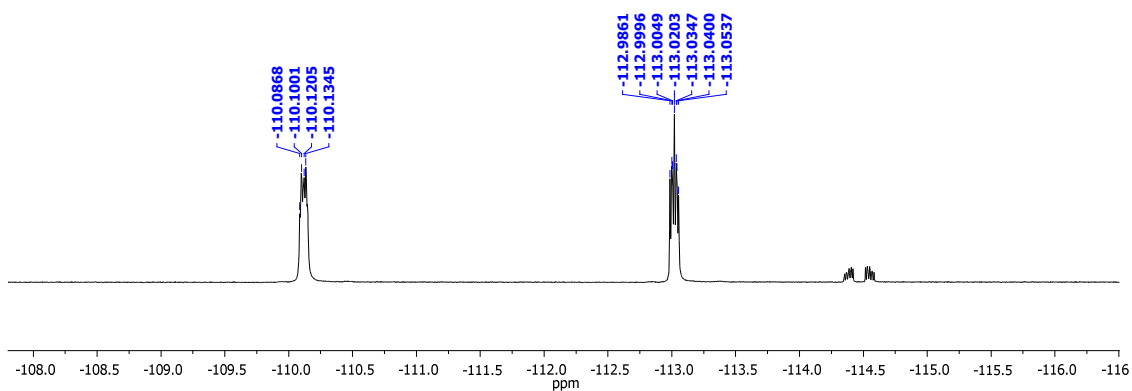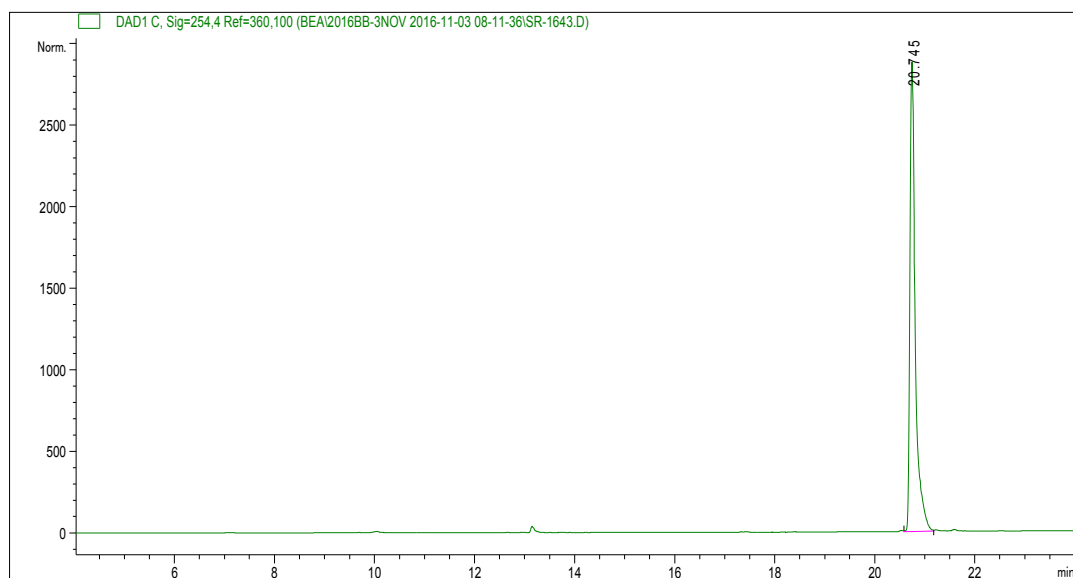

$^1\text{H}$  NMR (500 MHz, DMSO-*d*<sub>6</sub>)  $\delta$  11.46 (s, 1H), 8.86 (d,  $J$  = 2.7 Hz, 1H), 8.12 (dd,  $J$  = 9.0, 5.3 Hz, 1H), 8.00 (t,  $J$  = 8.0 Hz, 2H), 7.87 (d,  $J$  = 8.2 Hz, 1H), 7.66 (t,  $J$  = 7.6 Hz, 1H), 7.57 (t,  $J$  = 7.5 Hz, 1H), 7.45 (d,  $J$  = 2.7 Hz, 1H) and 7.36 (s, 2H) ppm.

$^{19}\text{F}$  NMR (470 MHz, CDCl<sub>3</sub>)  $\delta$  -110.12 (m) and -113.01 (m) ppm.

MS HRMS (ESI) calcd for C<sub>21</sub>H<sub>12</sub>BrCl<sub>2</sub>F<sub>2</sub>N<sub>2</sub>O<sub>3</sub>S (M-H<sup>+</sup>): 558.9092 / 558.9072, found 558.9048 / 558.9035.

**Anal HPLC** Analytical HPLC: Sample was dissolved in methanol (1 mg/ ml) and eluted with solvent A: 0.1% TFA in Milliq water and solvent B: 0.08% TFA in MeCN on a phenomenex Luna 5  $\mu$ m C18 (2) (250 x 4.60 mm), flow rate = 1 ml/min, gradient 0–100% of solvent B over 30 min, with UV detection at 215 nm. Retention time 21.74 min. Purity > 98 %.

**(10): 4-bromo-N-(3,5-dichloro-4-(quinolin-3-yloxy)phenyl)benzenesulfonamide:** The title compound was made following the same general protocol as described for **3a**, using 2,5-difluoro-4-bromosulfonyl chloride.

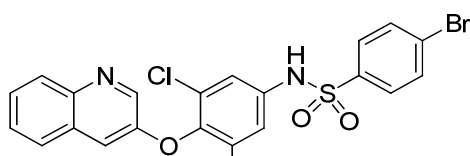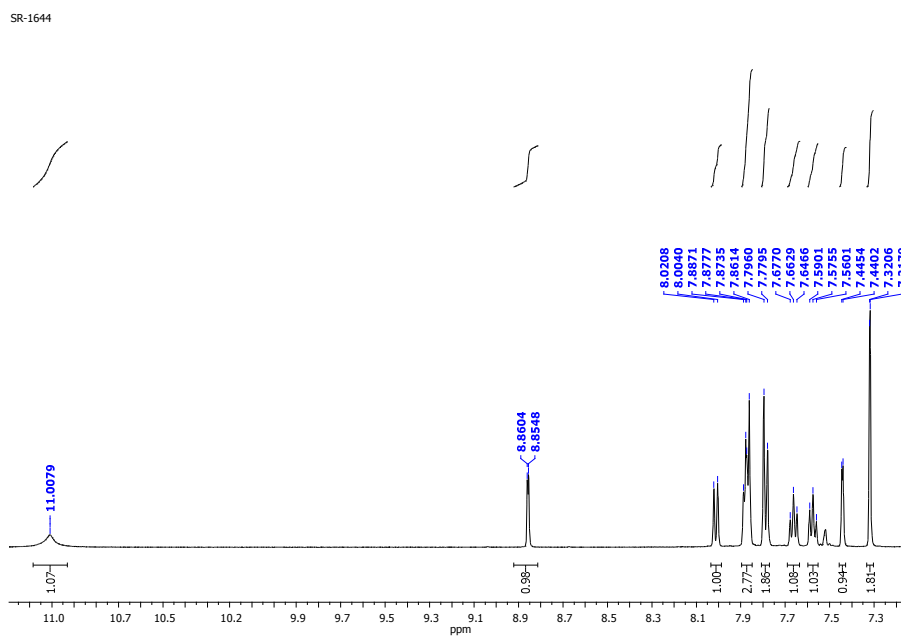

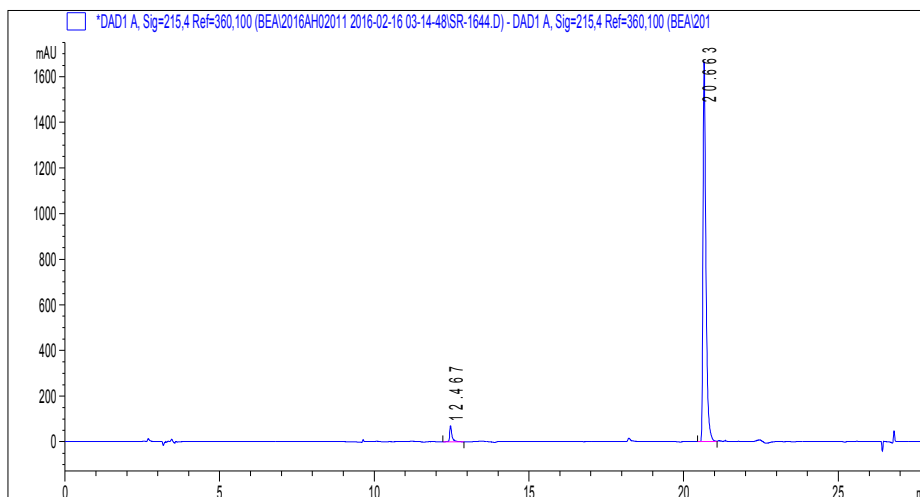

$^1\text{H NMR}$  (500 MHz,  $\text{DMSO-}d_6$ )  $\delta$  11.01 (s, 1H), 8.86 (d,  $J = 2.8$  Hz, 1H), 8.01 (d,  $J = 8.4$  Hz, 1H), 7.90–7.85 (m, 3H), 7.79 (d,  $J = 8.2$  Hz, 2H), 7.69–7.64 (m, 1H), 7.60–7.55 (m, 1H), 7.44 (d,  $J = 2.6$  Hz, 1H) and 7.32 (s,  $J = 1.4$  Hz, 2H) ppm.

**MS HRMS** (ESI) calcd for  $\text{C}_{21}\text{H}_{14}\text{BrCl}_2\text{N}_2\text{O}_3\text{S}$  ( $\text{M-H}^+$ ): 522.9280, found 522.9298.

**Anal HPLC** Analytical HPLC: Sample was dissolved in methanol (1 mg/ml) and eluted with solvent A: 0.1% TFA in Milliq water and solvent B: 0.08% TFA in MeCN on a phenomenex Luna 5  $\mu\text{m}$  C18 (2) (250 x 4.60 mm), flow rate = 1 ml/min, gradient 0–100% of solvent B over 30 min, with UV detection at 215 nm. Retention time 20.66 min. Purity 96 %.

**(11): N-(3,5-dichloro-4-(quinolin-3-yloxy)phenyl)naphthalene-2-sulfonamide:** The title compound was made following the same general protocol as described for **3a**, using 2-naphthylsulfonyl chloride.

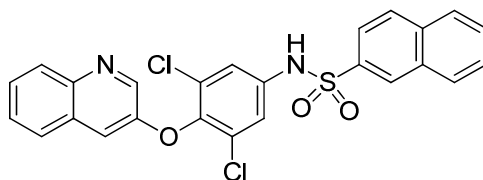

SR-1645

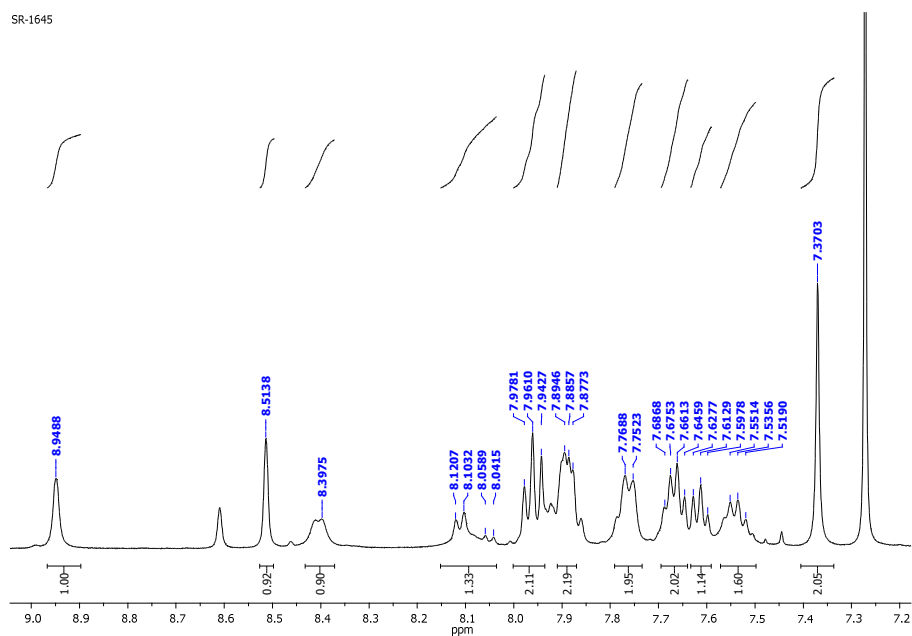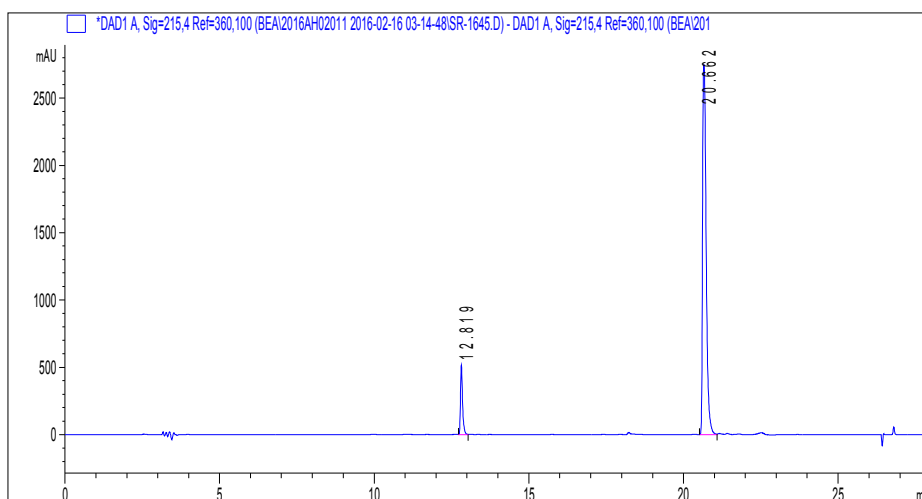

$^1\text{H NMR}$  (500 MHz,  $\text{CDCl}_3$ )  $\delta$  8.95 (s, 1H), 8.51 (s, 1H), 8.43–8.37 (m, 1H), 8.15–8.04 (m, 1H), 8.00–7.94 (m, 2H), 7.91–7.87 (m, 2H), 7.77 (t,  $J = 9.3$  Hz, 2H), 7.67 (dd,  $J = 13.7, 6.7$  Hz, 2H), 7.63–7.59 (m, 1H), 7.57–7.50 (m, 2H) and 7.37 (s, 2H) ppm.

**MS HRMS** (ESI) calcd for  $\text{C}_{25}\text{H}_{17}\text{Cl}_2\text{N}_2\text{O}_3\text{S}$  ( $\text{M}-\text{H}^+$ ): 495.0331, found 495.0346.

**Anal HPLC** Analytical HPLC: Sample was dissolved in methanol (1 mg/ ml) and eluted with solvent A: 0.1% TFA in Milliq water and solvent B: 0.08% TFA in MeCN on a phenomenex Luna 5  $\mu\text{M}$  C18

(2) (250 x 4.60 mm), flow rate = 1 ml/min, gradient 0–100% of solvent B over 30 min, with UV detection at 215 nm. Retention time 20.66 min. Purity 90 %.

**(12): 2-chloro-N-(3,5-dichloro-4-(quinolin-3-yloxy)phenyl)benzenesulfonamide:** The title compound was made following the same general protocol as described for **3a**, using 2-chlorosulfonyl chloride.

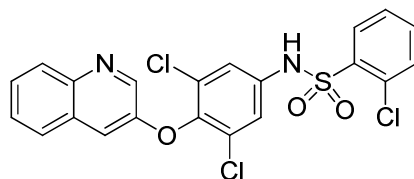

SR-1646

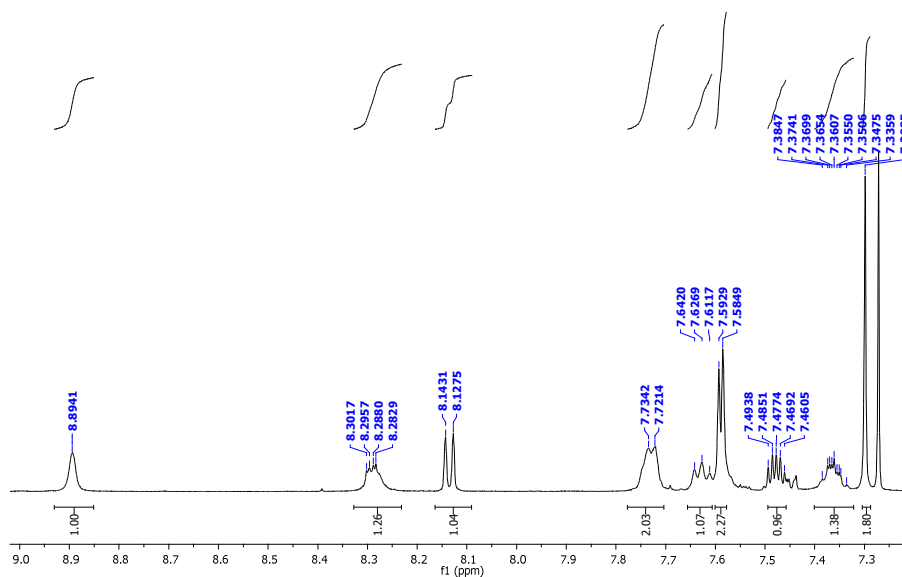



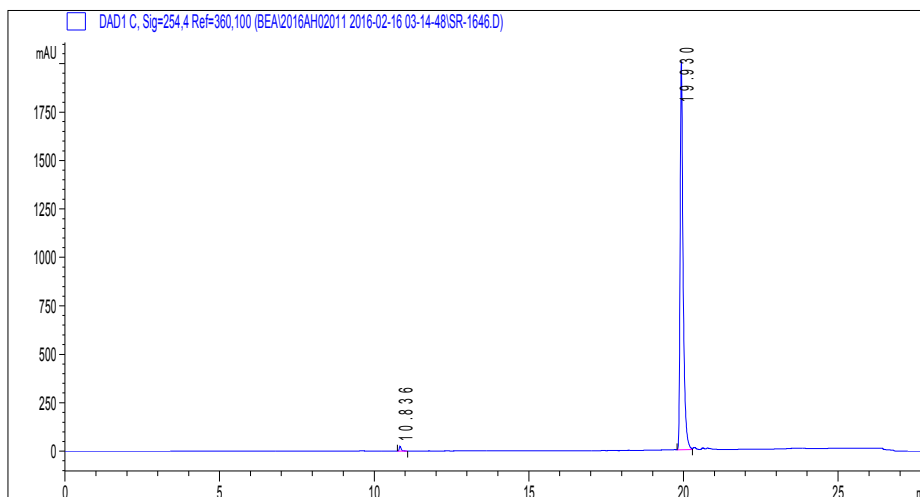

$^1\text{H NMR}$  (500 MHz,  $\text{CDCl}_3$ )  $\delta$  8.89 (s, 1H), 8.33–8.23 (m, 1H), 8.14 (d,  $J = 7.8$  Hz, 1H), 7.73 (d,  $J = 6.4$  Hz, 2H), 7.66–7.60 (m, 1H), 7.59 (d,  $J = 4.0$  Hz, 2H), 7.49–7.45 (m, 1H), 7.36 (m, 1H) and 7.30 (s, 2H) ppm.

**MS HRMS** (ESI) calcd for  $\text{C}_{21}\text{H}_{13}\text{Cl}_3\text{N}_2\text{O}_3\text{S}$  ( $\text{M}-\text{H}^+$ ): 478.9785, found 478.9790.

**Anal HPLC** Analytical HPLC: Sample was dissolved in methanol (1 mg/ml) and eluted with solvent A: 0.1% TFA in Milliq water and solvent B: 0.08% TFA in MeCN on a phenomenex Luna 5  $\mu\text{M}$  C18 (2) (250 x 4.60 mm), flow rate = 1 ml/min, gradient 0–100% of solvent B over 30 min, with UV detection at 254 nm. Retention time 19.93 min. Purity 99 %.

**(13): N-(3,5-dichloro-4-(quinolin-3-yloxy)phenyl)-2,4,6-trimethylbenzenesulfonamide:** The title compound was made following the same general protocol as described for **3a**, using 2,4,6-trimethylsulfonyl chloride.

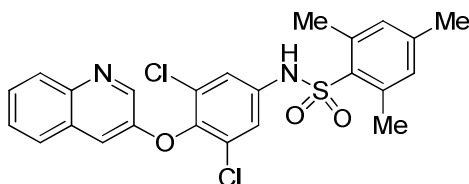

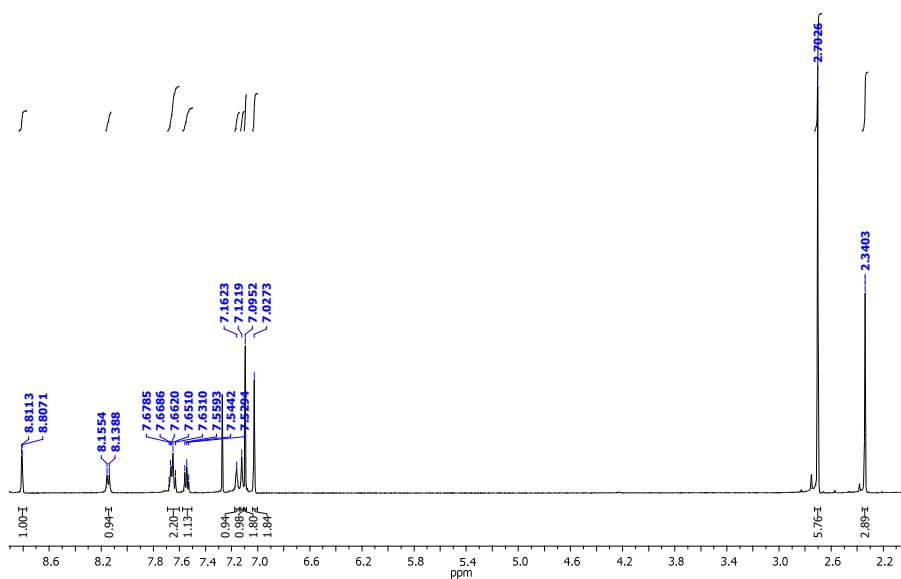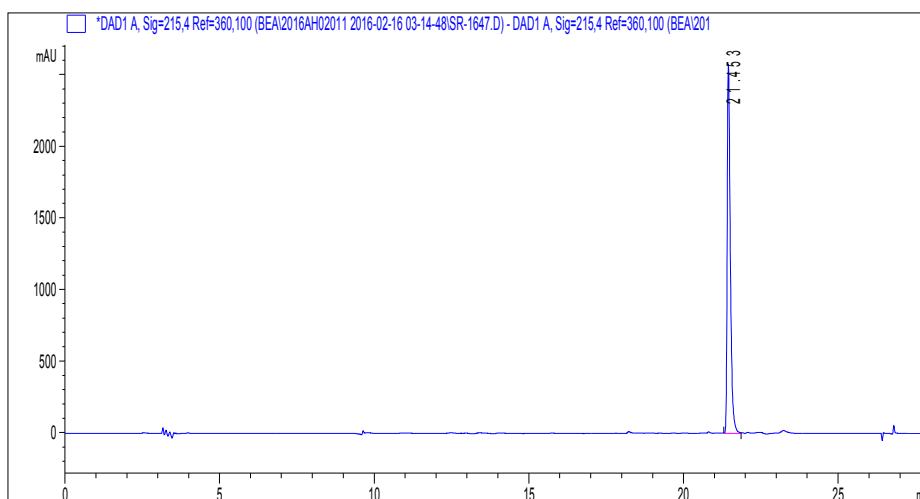

$^1\text{H NMR}$  (500 MHz,  $\text{CDCl}_3$ )  $\delta$  8.81 (d,  $J = 2.1$  Hz, 1H), 8.15 (d,  $J = 8.3$  Hz, 1H), 7.69–7.60 (m, 2H), 7.54 (t,  $J = 7.5$  Hz, 1H), 7.16 (s, 1H), 7.11 (d,  $J = 7.7$  Hz, 1H), 7.10 (s, 2H), 7.03 (s, 2H), 2.70 (s, 6H) and 2.34 (s, 3H) ppm.

**MS HRMS** (ESI) calcd for  $\text{C}_{24}\text{H}_{21}\text{Cl}_2\text{N}_2\text{O}_3\text{S}$  ( $\text{M}-\text{H}^+$ ): 487.0644, found 487.0651.

**Anal HPLC** Analytical HPLC: Sample was dissolved in methanol (1 mg/ ml) and eluted with solvent A: 0.1% TFA in Milliq water and solvent B: 0.08% TFA in MeCN on a phenomenex Luna 5  $\mu\text{M}$  C18 (2)

(250 x 4.60 mm), flow rate = 1 ml/min, gradient 0–100% of solvent B over 30 min, with UV detection at 215 nm. Retention time 21.45 min. Purity 100 %.

**(14): N-(3,5-dichloro-4-(quinolin-3-yloxy)phenyl)thiophene-2-sulfonamide:** The title compound was made following the same general protocol as described for **3a**, using 2-thiophenesulfonyl chloride.

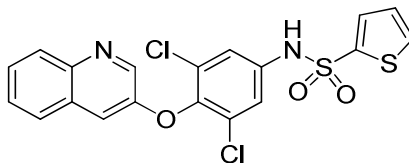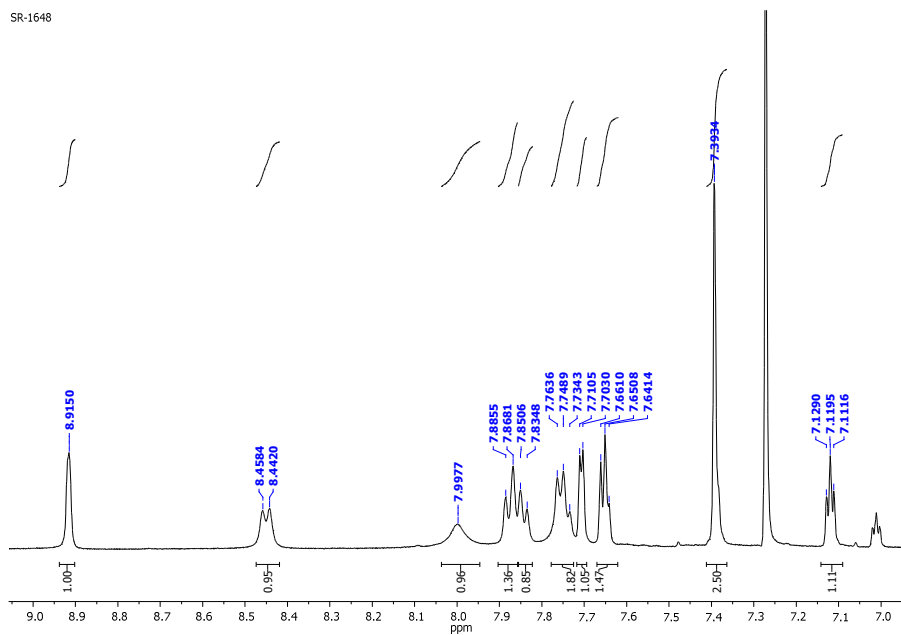

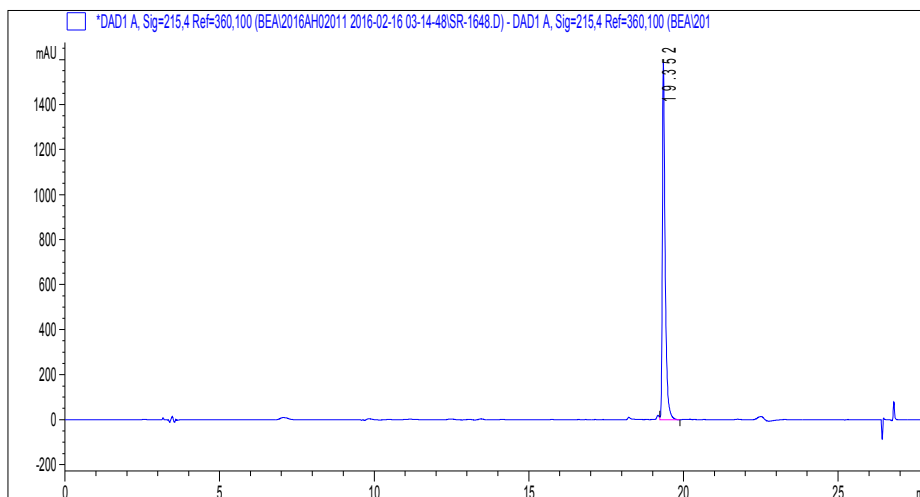

$^1\text{H NMR}$  (500 MHz,  $\text{CDCl}_3$ )  $\delta$  8.91 (s, 2H), 8.45 (d,  $J = 8.0$  Hz, 2H), 8.04–7.95 (m, 2H), 7.88 (d,  $J = 8.8$  Hz, 1H), 7.84 (d,  $J = 7.9$  Hz, 1H), 7.78–7.73 (m, 2H), 7.71 (d,  $J = 3.7$  Hz, 1H), 7.65 (t,  $J = 4.9$  Hz, 1H), 7.39 (s, 2H) and 7.12 (t,  $J = 4.4$  Hz, 1H) ppm.

**MS HRMS** (ESI) calcd for  $\text{C}_{19}\text{H}_{13}\text{Cl}_2\text{N}_2\text{O}_3\text{S}_2$  ( $\text{M}-\text{H}^+$ ): 450.9739, found 450.9743.

**Anal HPLC** Analytical HPLC: Sample was dissolved in methanol (1 mg/ml) and eluted with solvent A: 0.1% TFA in Milliq water and solvent B: 0.08% TFA in MeCN on a phenomenex Luna 5  $\mu\text{M}$  C18 (2) (250 x 4.60 mm), flow rate = 1 ml/min, gradient 0–100% of solvent B over 30 min, with UV detection at 215 nm. Retention time 19.35 min. Purity 100 %.

**Supplemental Figure 1.** . Shown is a wall-eye stereo image of the electron density map (composite omit map) contoured at  $1.5\sigma$  around **9**.

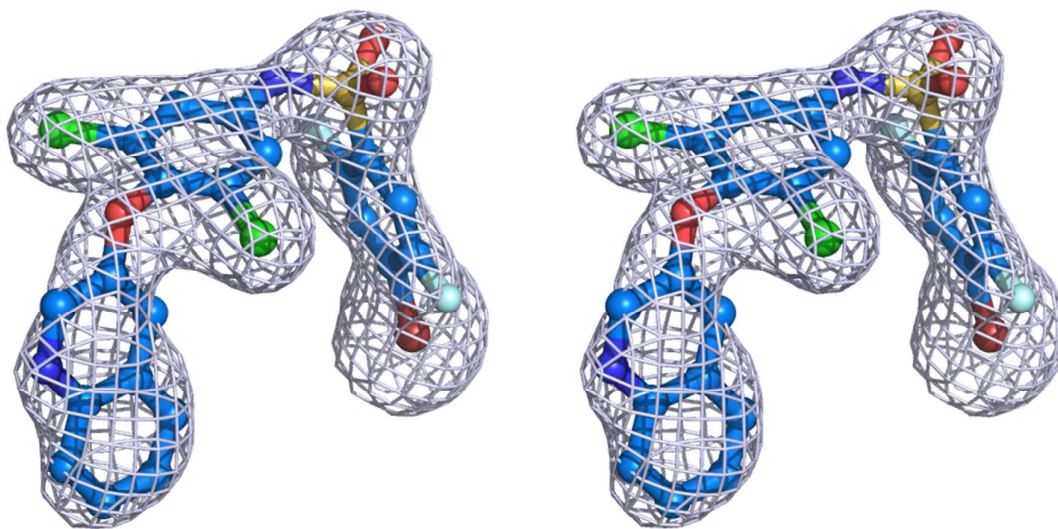

**Supplemental Figure 2.** Shown is a superimposition of the published X-ray crystal structure of INT131 bound to the PPAR $\gamma$  LBD (yellow) with the docked model of INT131 (cyan) bound to PPAR $\gamma$ .

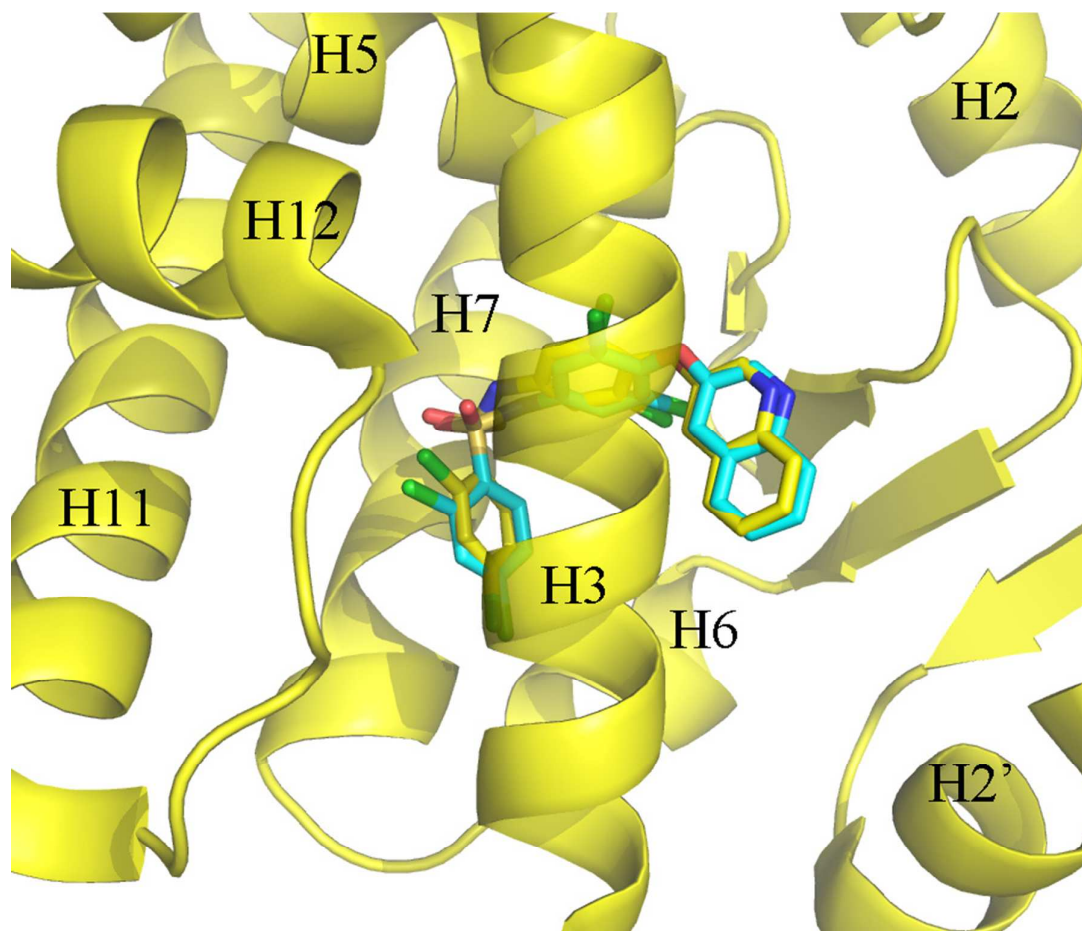

Supplement: NIHMS882146-supplement-Supplemental.pdf [file NIHMS882146-supplement-Supplemental.pdf]
